## AIR-CONDUCTION AND BONE-CONDUCTION REFERENCE THRESHOLD LEVELS – A MULTICENTER STUDY

Robert H. Margolis<sup>a,b</sup>, Victoria Sanchez<sup>c</sup>, Lisa L. Hunter<sup>d</sup>, Aparna Rao<sup>a</sup>, Suzannah Boyle<sup>c</sup>, Lina Motlagh Zadeh<sup>d</sup>, Amelia N. Wong<sup>a</sup>

<sup>a</sup>Arizona State University College of Health Solutions, Tempe, AZ

<sup>b</sup>Audiology Incorporated, Arden Hills, MN

<sup>c</sup>University of South Florida Morsani College of Medicine, Tampa, FL

<sup>d</sup>Cincinnati Childrens Hospital Medical Center, Cincinnati, OH

Correspondence:

Robert H. Margolis  
Audiology Incorporated  
4410 Dellwood St.  
Arden Hills, MN 55112  
612 805-7485  
[Rhargo001@gmail.com](mailto:Rhargo001@gmail.com)

## ABSTRACT

**Objectives:** Air-conduction (AC) and bone-conduction (BC) thresholds were measured to evaluate standard reference-threshold values and recommend revisions to the audiometer standards.

**Design:** AC and BC thresholds were measured from listeners with normal hearing (NH) and sensorineural hearing loss (SNHL) at three sites with recently-calibrated audiometers.

**Study Sample:** NH participants (n = 53) were selected based on age (18 – 25 years), normal AC thresholds, tympanometry and otoscopy, and absence of otologic disease. SNHL participants (n = 49) were selected based on AC thresholds, tympanometry and otoscopy, and absence of otologic disease.

**Results:** AC thresholds obtained from NH listeners with the Radioear DD450 earphone averaged 3.7 dB HL. Air bone gaps (ABGs) occurred in NH and SNHL listeners above 2000 Hz and SNHL listeners at 250 Hz. ABGs were larger in SNHL listeners than NH listeners.

**Conclusions:** Small corrections to the standard circumaural earphone RETSPLs are recommended for use with the DD450 earphone. The causes of ABGs in listeners without conductive pathology are discussed. False ABGs place patients at risk for unnecessary medical and surgical intervention. Reference threshold levels are recommended that will achieve two objectives: 1) AC thresholds from young NH listeners should average 0 dB HL; 2) ABGs from listeners with normal middle-ear function should average 0 dB.

**Key Words:** bone conduction threshold, air conduction threshold, air-bone gap, audiometer standards, circumaural earphone

### Abbreviations:

ABG – Air bone gap – the difference between the air conduction threshold and the bone conduction threshold at a given frequency

AC – Air conduction

BC – Bone conduction

RETFL – Reference Equivalent Threshold Force Level

RETSPL – Reference Equivalent Threshold Sound Pressure Level

## INTRODUCTION

Beginning in 2010, a series of articles was published that document the occurrence of air-bone gaps in listeners with normal hearing and listeners with sensorineural hearing loss (SNHL). In a study performed at Cambridge (U.K.) University, listeners with SNHL exhibited air-bone gaps at 4000 Hz averaging 19.3 dB when tested with AMTAS (Automated Method for Testing Auditory Sensitivity) and 13.2 dB when tested with conventional manual pure-tone audiometry (Margolis et al. 2010). The finding was replicated in follow-up studies using both manual and automated audiometry performed in the U.S. (Margolis et al., 2013), Germany (Fröhlich et al. 2018), India (Vijayasathy and Shetty 2023), and Australia (Eikelboom and Swanepoel, unpublished, data presented in Margolis et al., 2013). These false air-bone gaps result from incorrect reference equivalent threshold force levels (RETFLs) for high-frequency (>2000 Hz) stimuli in the International and American audiometer standards (ISO 389-3-2016; ANSI S3.6-2018). The history and sources of the error were reviewed by Margolis et al. (2019).

False air-bone gaps are potentially dangerous to patients. Vijayasathy and Shetty (2003) pointed out that incorrect diagnosis of conductive pathology resulting from false air-bone gaps can lead to “unnecessary surgical and/or medical intervention” (p. 57).

The magnitude of false air-bone gaps increases with the degree of hearing loss (measured by the air-conduction threshold at the test frequency). We hypothesize that the reason for the dependence on hearing loss magnitude is that bone-conduction thresholds for normal-hearing listeners are elevated by ambient and physiological noise (Carhart, 1950; Roach and Carhart, 1956). Because bone-conduction stimuli presented to hearing-impaired listeners are necessarily presented at higher levels, the stimuli are well above the noise floor and unaffected by it. This results in the dependence of the false 4000-Hz air-bone gap on hearing sensitivity reported by Margolis et al. (2013), Margolis et al. (2019), Wasserman (2018 summarized in Margolis et al, 2019), Vijayasathy and Shetty (2023), and the current study.

ISO 389-9-2009 specifies the preferred test methods for studies that seek to determine reference equivalent threshold levels for incorporation into the audiometer standards. That standard states that the subjects shall be “otologically normal”. Because hearing loss is a symptom of ear disease, listeners with hearing loss have been excluded from being participants in studies intended to derive reference threshold levels. In this report the recommended reference equivalent threshold force levels (RETFL) for bone-conduction stimuli are based on threshold data from listeners with SNHL for reasons that are explained in the Discussion (Recommended Reference Equivalent Force Levels). In this study the procedures specified in ISO 389-9 were carefully followed with listeners with both normal hearing and SNHL. The goal was to provide additional evidence of false air-bone gaps that occur when audiometers are calibrated to standard RETFLs and to provide recommended air-conduction reference equivalent threshold sound pressure levels (RETSPL) for the most commonly used circumaural earphone (Radioear DD450) and bone-conduction RETFLs for the Radioear B-81 bone vibrator at octave and interoctave audiometric test frequencies specified in ISO 389-3:2016 (Table 1) and ANSI S3.21-2004 (par. 6.3). Correctly-defined RETSPLs and RETFLs should result in average air-bone gaps of 0 dB at all frequencies for listeners with normal middle-ear function.

## **METHOD**

### **Data Collection Sites**

Data were collected at three sites. Institutional review board approval was obtained at each site: Arizona State University (ASU; IRB approval STUDY00014515), Cincinnati Children’s Hospital Medical Center (CCHMC; IRB approval 2009-0855), and University of South Florida (USF; IRB approval STUDY000265).

## Participants

An oral case history was obtained to obtain information related to ear disease, noise exposure, and family history following the questionnaire in ISO 389-9 (Annex A). Participants in the normal-hearing group were otologically normal as defined in ISO 389-9 (par. 4.1.3) and Møller (1996). Specific criteria for normal-hearing participants were a) age 18-25 years; b) normal tympanograms (tympanometric peak pressure  $\geq -50$  daPa; static admittance at 226 Hz  $\geq 0.4$  mmho; tympanometric width at 226 Hz  $< 200$  daPa;) c) otoscopy – no ear-canal occlusion or other abnormality; d) case history – no prolonged or frequent exposure to high level noise; no prolonged exposure to ototoxic medications; no family history of genetic hearing loss; no known history of otologic disease that may cause permanent threshold shift. Additional criteria for participants with SNHL were a) age 18-80 years; air-conduction threshold  $\geq 35$  dB at one or more frequencies above 1000 Hz; b) no known history of otologic disease that may cause permanent threshold shift; c) no external or middle-ear infections in the past five years. A total of 53 participants with normal hearing (30 female, 23 male; mean age = 22 yrs; SD = 2.2 yrs) and 49 participants with SNHL (21 female, 28 male; mean age = 62 yrs; SD = 15.7 yrs) were tested.

## Procedures

Air-conduction thresholds were tested at standard octave and interoctave frequencies (250 – 8000 Hz). Automated and manual pure-tone audiometric methods were employed. Table 1 shows threshold measurement methods and bone-conductor placement utilized at the three sites.

**Table 1. Threshold measurement methods and bone vibrator placement at the three test sites.**

|              | <b>Air<br/>Conduction<br/>Method</b> | <b>Bone<br/>Conduction<br/>Placement</b> | <b>Bone<br/>Conduction<br/>Method</b> |
|--------------|--------------------------------------|------------------------------------------|---------------------------------------|
| <b>ASU</b>   | AMTAS                                | Mastoid                                  | Manual                                |
| <b>CCHMC</b> | AMTAS                                | Forehead                                 | Manual                                |
| <b>USF</b>   | Manual                               | Forehead                                 | AMTAS                                 |

Air-conduction testing was performed with Radioear DD450 circumaural earphones calibrated to Sennheiser HDA 200 RETSPLs in ANSI S3.6-2018 and ISO 389-8-2004. A comparison study demonstrated the equivalence of RETSPLs derived for the two circumaural earphones (Smull et al., 2018). Air-conduction thresholds were tested in both ears but data for one ear (randomly selected) of each subject (equal numbers of right and left ears) were analyzed. Bone-conduction thresholds were analyzed for the ear that was analyzed for air conduction. Test frequencies were octave and interoctave frequencies over the range 250 – 8000 Hz for air conduction and bone conduction. The ear that was analyzed was randomly selected (rather than best ear) because selection of the best ear would produce a biased sample of the population.

Air-conduction testing was performed with AMTAS at two sites and by manual audiometry at one site (Table 1). Validation studies have demonstrated equivalent results with AMTAS and manual audiometry (Margolis et al., 2010, 2016; Eikelboom et al., 2013; Mahomed et al., 2013; Margolis & Moore, 2013). AMTAS is a computer-controlled threshold-measurement method that utilizes a single-interval, YES-NO, forced-choice paradigm with feedback. Stimuli are presented with a bracketing technique similar to the Hughson-Westlake method (Jerger & Carhart, 1959). Stimulus levels descend in 10-dB steps until a “no” response occurs and then brackets in 5-dB steps. Threshold is defined as the level at which two YES responses each following NO responses occur within a 5-dB range. If the two NO responses occur at different levels the higher of the two levels is defined as threshold. The higher of the two levels was chosen because it produced better agreement with manual audiometry. Manual audiometry was performed with a modified Hughson-Westlake method described in ANSI S3.21-2004.

Bone vibrator placement was mastoid or forehead (Table 1). International and American standards provide mastoid – forehead conversion factors (ISO 389-3-2016 Annex C; ANSI S3.6 – 2023 Table 8). Bone-conduction thresholds were tested in one ear with a Radioear B-81 bone vibrator at the same frequencies as air-conduction testing. Bone-conduction testing was performed with the bone

vibrator secured by an elastic headband designed to exert the proper force (5.4 N on an average adult head size; ISO-389-3 – par. B.4; ANSI S3.6-2023 – par 9.4.3) on the bone vibrator (Margolis & Margolis, 2022), the test ear uncovered, and the non-test ear covered with the circumaural earphone to deliver masking. A narrow-band masking noise was delivered to the non-test ear at 20 dB above the signal level. All testing was performed in sound-attenuating rooms that meet the requirements for maximum permissible ambient noise levels for air-conduction and bone-conduction audiometry (ISO 8253-1 par. 11; ANSI S3.1 par.4). The additional attenuation provided by Radioear DD450 circumaural enclosures (Margolis et al., 2022) provides increased protection against effects of ambient noise.

Bone-conduction stimuli were calibrated with mastoid RETFLs. The forehead-mastoid conversion factors (ANSI S3.6-2018, Table 8, p. 33; ISO 389-3-2016, Table C.1, p. 10) were applied to the USF and CCHMC bone-conduction thresholds that were obtained with forehead placement.

Bias in bone-conduction testing has been demonstrated in manual pure-tone audiometry (Margolis et al., 2016). The bias results from the tester's knowledge of air-conduction thresholds when testing bone conduction. In this study bias was controlled by several methods. At the ASU site, bone conduction was tested manually with the tester having no knowledge of air-conduction thresholds. At the USF site, air conduction and bone conduction were tested with AMTAS, with no influence of air-conduction thresholds on bone-conduction thresholds. At the CCHMC site where bone conduction was tested with forehead placement, bone conduction was calibrated to mastoid values so that the tester did not know the actual bone-conduction stimulus level and was told not to expect air and bone-conduction thresholds to agree, a method used by Fröhlich et al. (2016). Bone-conduction thresholds were converted to mastoid levels with the conversions presented in the standards.

## Calibration

Audiometers at the three sites were calibrated at the e3 Diagnostics (Arlington Heights IL) with equipment, methods, and reference threshold levels specified in ANSI S3.6-2018 (Section 9.1-9.4, pp. 25-32) and ISO 389-9 2009 (Section 5.2.3, p. 4). The same equipment was used to calibrate all audiometers. The B&K 4930 Artificial Mastoid and Larson Davis System 824 Sound Level Meter were calibrated by the manufacturers within one year of the audiometer calibration dates. Sound room ambient noise levels were performed at each site to assure compliance with maximum allowable levels.

The Radioear DD450 earphones used at each site were calibrated on an ISO 60318 coupler with a 1/2-inch Bruel and Kjaer condenser microphone (B&K 4180). The sound level meter calibration was checked and adjusted if necessary with the Bruel & Kjaer sound calibrator (B&K 4231) prior to calibration of each audiometer.

The Radioear B-81 bone vibrators were calibrated on the Artificial Mastoid with a coupling load of 5.4 N. The coupling load was measured and adjusted with the calibrated spring balance (B&K UA-0247) provided by the manufacturer. The bone vibrator was positioned on the Artificial Mastoid with the centering tool provided by the manufacturer.

## Statistical Analysis

Differences between air- and bone-conduction thresholds were analyzed separately for the normal-hearing and SNHL groups by analysis of variance with post-hoc analysis to identify test frequencies where differences occurred. In addition, differences between air-bone gaps for the two groups were analyzed. Statistical tests were performed with SPSS (IBM SPSS Statistics for Macintosh, Version 28.0. Armonk, NY: IBM Corp., Released 2021). Repeated-measures ANOVA was completed with mode (air conduction vs. bone conduction) and frequency (250 Hz, 500 Hz, 750 Hz, 1000 Hz, 1500 Hz, 2000 Hz, 3000 Hz, 4000 Hz, 6000 Hz, 8000 Hz) as within-subject factors and test site as a between-



subjects factor. Percentiles (5<sup>th</sup> and 95<sup>th</sup>) were calculated by the PERCENTILE.INC function of Microsoft Excel (Version 2402 Build 16.0.17328.20124) 64-bit).

## RESULTS

Individual air-conduction thresholds, bone-conduction thresholds, and air-bone gaps are archived in the Supplemental Digital Content document for this article. Table 2 shows means, standard deviations, 5<sup>TH</sup> percentiles, and 95<sup>th</sup> percentiles of air-conduction thresholds, bone-conduction thresholds, and air-bone gaps for the two participant groups. For the participants with normal hearing the main effect of frequency was significant ( $F(1, 9) = 3.7, p < .001$ ). Pairwise comparisons showed significant differences ( $p < .05$ ) between means only for 3000 /6000 Hz and 6000/8000 Hz.

The main effect of mode (air conduction v. bone conduction) was significant ( $F[1, 49] = 18, p < .01$ ). Post hoc analysis (Tukey post-hoc test with Bonferroni correction) revealed significant differences ( $P < 0.01$ ) at all frequencies above 1500 Hz indicating significant air-bone gaps at those frequencies. For the SNHL group the main effect of mode was significant ( $F[1, 37] = 32.2, p < .01$ ). Post hoc analysis revealed significant differences ( $P < 0.05$ ) at 250 Hz and all frequencies above 1500 Hz indicating significant air-bone gaps at those frequencies. Analysis of air-conduction threshold differences among sites indicated significant differences ( $F(1,2) = 29, p < .001$ ). Examination of the means (see supplemental digital content) show that the thresholds obtained at the ASU site were higher than the other sites. Analysis of air-bone gap differences were not significant at the 0.05 confidence level ( $F(1,2) = 3.1, p .054$ ).

**Table 2. Means, standard deviations, 5<sup>th</sup> percentiles, and 95<sup>th</sup> percentiles of air-conduction (AC) thresholds, bone-conduction (BC) thresholds, and air-bone gaps (ABG) for normal hearing (NH) and sensorineural hearing loss (SNHL) participants.**

|      |           | FREQUENCY (Hz) |      |      |      |      |      |      |      |      |      |
|------|-----------|----------------|------|------|------|------|------|------|------|------|------|
|      |           | 250            | 500  | 750  | 1000 | 1500 | 2000 | 3000 | 4000 | 6000 | 8000 |
| NH   | n         | 53             | 53   | 52   | 53   | 53   | 53   | 53   | 53   | 53   | 53   |
|      | Mean AC   | 4.6            | 3.5  | 4.5  | 3.3  | 3.0  | 2.8  | 5.7  | 3.0  | 1.6  | 5.1  |
|      | SD        | 7              | 7    | 6    | 5    | 6    | 6    | 7    | 6    | 6    | 7    |
|      | 5th %ile  | -5             | -5   | -5   | -5   | -5   | -5   | -5   | -5   | -5   | -5   |
|      | 95th %ile | 15             | 17   | 15   | 12   | 15   | 10   | 17   | 12   | 10   | 15   |
|      | Mean BC   | 2.7            | 4.5  | 5.3  | 5.0  | 4.4  | 7.5  | 0.6  | -6.4 | -4.2 | -7.8 |
|      | SD        | 11             | 10   | 9    | 8    | 8    | 9    | 9    | 9    | 6    | 7    |
|      | 5th %ile  | 19             | 20   | 18   | 17   | 15   | 21   | 14   | 7    | 5    | 5    |
|      | 95th %ile | -13            | -10  | -9   | -5   | -8   | -10  | -10  | -24  | -11  | -17  |
|      | Mean ABG  | 1.9            | -1.0 | -0.6 | -1.7 | -1.4 | -4.7 | 5.1  | 9.4  | 5.8  | 12.9 |
|      | SD        | 10             | 8    | 8    | 7    | 9    | 9    | 11   | 9    | 8    | 9    |
|      | 5th %ile  | -14            | -15  | -15  | -15  | -15  | -20  | -10  | -4   | -5   | 0    |
|      | 95th %ile | 16             | 9    | 11   | 10   | 10   | 10   | 25   | 24   | 18   | 25   |
| SNHL | n         | 49             | 49   | 45   | 49   | 45   | 49   | 46   | 49   | 49   | 48   |
|      | Mean AC   | 18.1           | 21.1 | 27.9 | 29.7 | 38.0 | 40.6 | 49.5 | 51.7 | 49.1 | 53.3 |
|      | SD        | 17             | 16   | 16   | 16   | 16   | 15   | 14   | 14   | 19   | 24   |
|      | 5th %ile  | 50             | 53   | 54   | 58   | 59   | 63   | 74   | 70   | 73   | 88   |
|      | 95th %ile | -5             | 0    | 5    | 5    | 10   | 15   | 30   | 30   | 17   | 10   |
|      | Mean BC   | 7.5            | 20.0 | 26.7 | 30.2 | 39.2 | 43.1 | 42.4 | 38.9 | 31.8 | 23.3 |
|      | SD        | 14             | 18   | 19   | 19   | 15   | 16   | 14   | 13   | 17   | 21   |
|      | 5th %ile  | 33             | 50   | 56   | 60   | 62   | 64   | 65   | 56   | 50   | 54   |
|      | 95th %ile | -10            | -5   | 2    | 0    | 16   | 21   | 21   | 16   | 0    | -18  |
|      | Mean ABG  | 9.8            | 0.4  | 0.5  | -0.5 | -0.8 | -2.7 | 6.8  | 13.0 | 15.6 | 31.0 |
|      | SD        | 13             | 11   | 10   | 9    | 11   | 10   | 11   | 11   | 12   | 16   |
|      | 5th %ile  | -9             | -18  | -10  | -14  | -15  | -15  | -12  | -2   | 0    | 15   |
|      | 95th %ile | 23             | 15   | 15   | 13   | 16   | 15   | 24   | 32   | 31   | 50   |

Figure 1 (left panel) shows average audiograms with thresholds rounded to the nearest 5 dB for listeners with normal hearing and SNHL. Thresholds are rounded to illustrate the appearance of a typical audiogram obtained with the 5-dB step size specified in the standards on pure tone audiometry (ISO 8253-1; ANSI S3.21). Average bone-conduction thresholds for normal-hearing listeners were within 5

dB of average air-conduction thresholds for frequencies 250 – 3000 Hz. At 4000 and 8000 Hz larger air-bone gaps were observed.

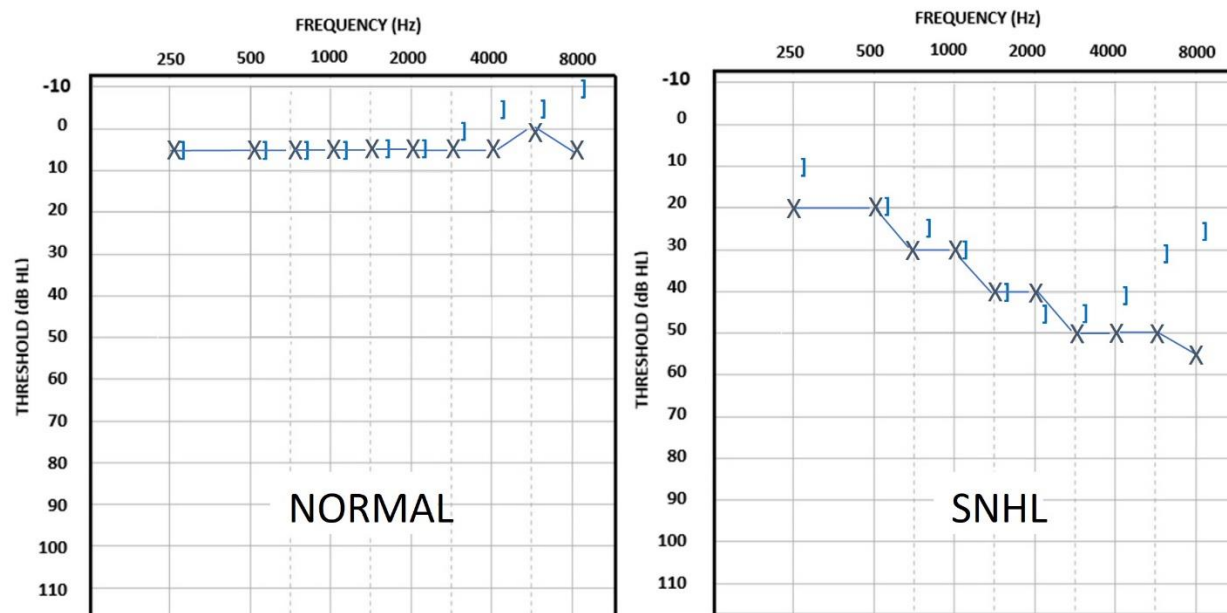

**Figure 1. Average audiograms showing thresholds rounded to the nearest 5 dB for the NH and SNHL groups.**

Figure 1 (right panel) shows average audiograms with thresholds rounded to the nearest 5 dB for listeners with SNHL. Average bone-conduction thresholds were within 5 dB of average air-conduction thresholds for frequencies 500 – 3000 Hz. At 250 Hz and above 3000 Hz larger air-bone gaps were observed. The air-bone gap tends to increase with frequency above 3000 Hz.

Figure 2 shows unrounded air-bone gaps and standard deviations for the normal and SNHL listeners. The main effect of group (normal v. SNHL) was significant ( $F[1, 90] = 15.5, p < .01$ ). Post hoc analysis revealed significant differences ( $P < 0.01$ ) at 250, 6000, and 8000 Hz indicating significant differences in air-bone gaps at those frequencies. Standard deviations are smaller for the normal-hearing group than the SNHL group.

The dependence of the air-bone gap on air-conduction hearing sensitivity is shown in Figure 3. Data from the current study are shown along with data from Margolis et al. (2013) and Wasserman

(2018 – reported in Margolis et al., 2019). Data from the current study are both groups combined for a total n of 89 cases. Data from the Margolis et al. (2013) study include 637 cases. The best fit linear function determined by linear regression of the weighted average of the three studies (solid line in Figure 3) increases at a rate of 1 dB for each 5 dB increment in air-conduction threshold.

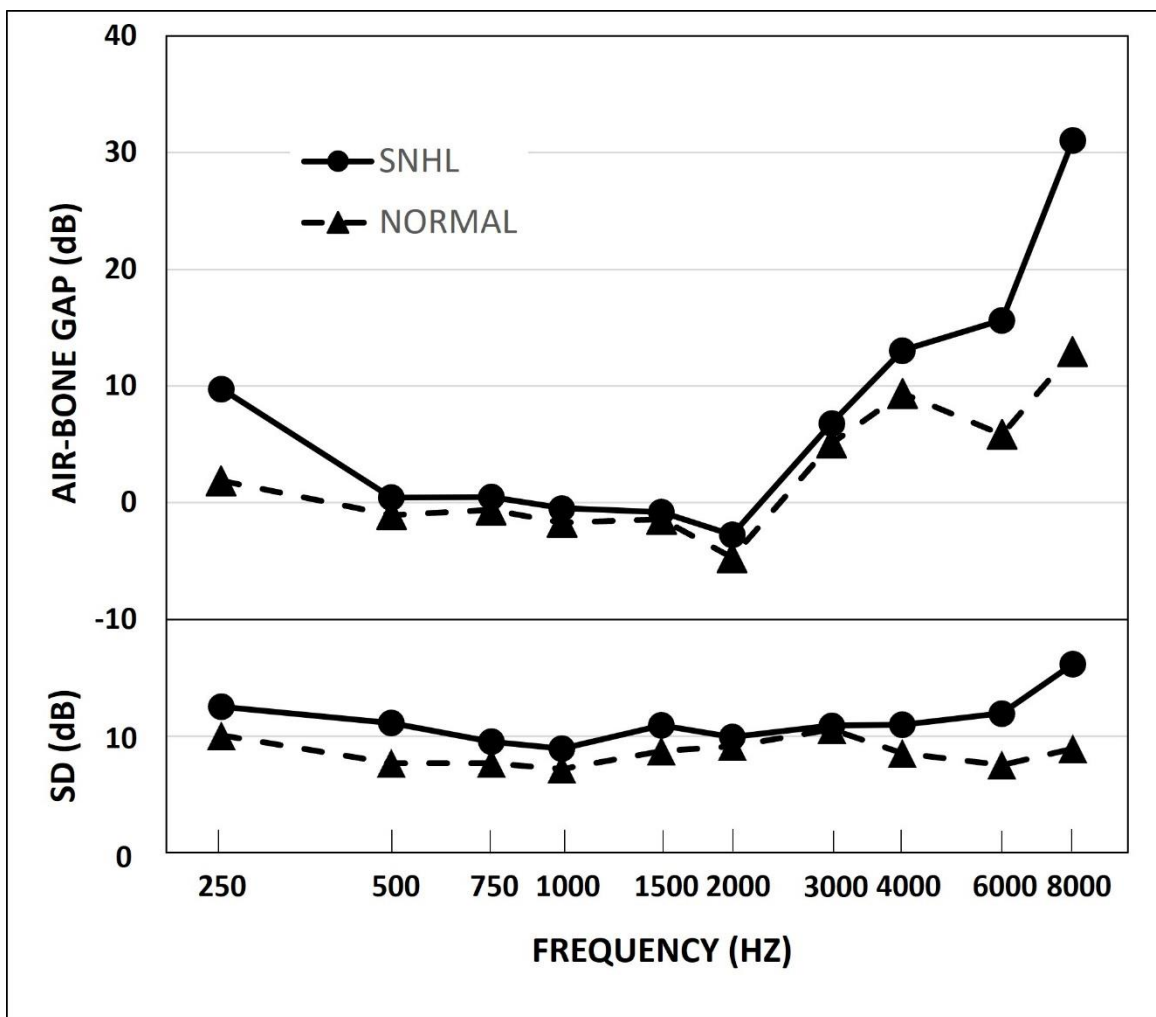

Figure 2. Average (unrounded) Air Bone Gaps and standard deviations (SD) and for the SNHL (circles) and NH (triangles) groups.

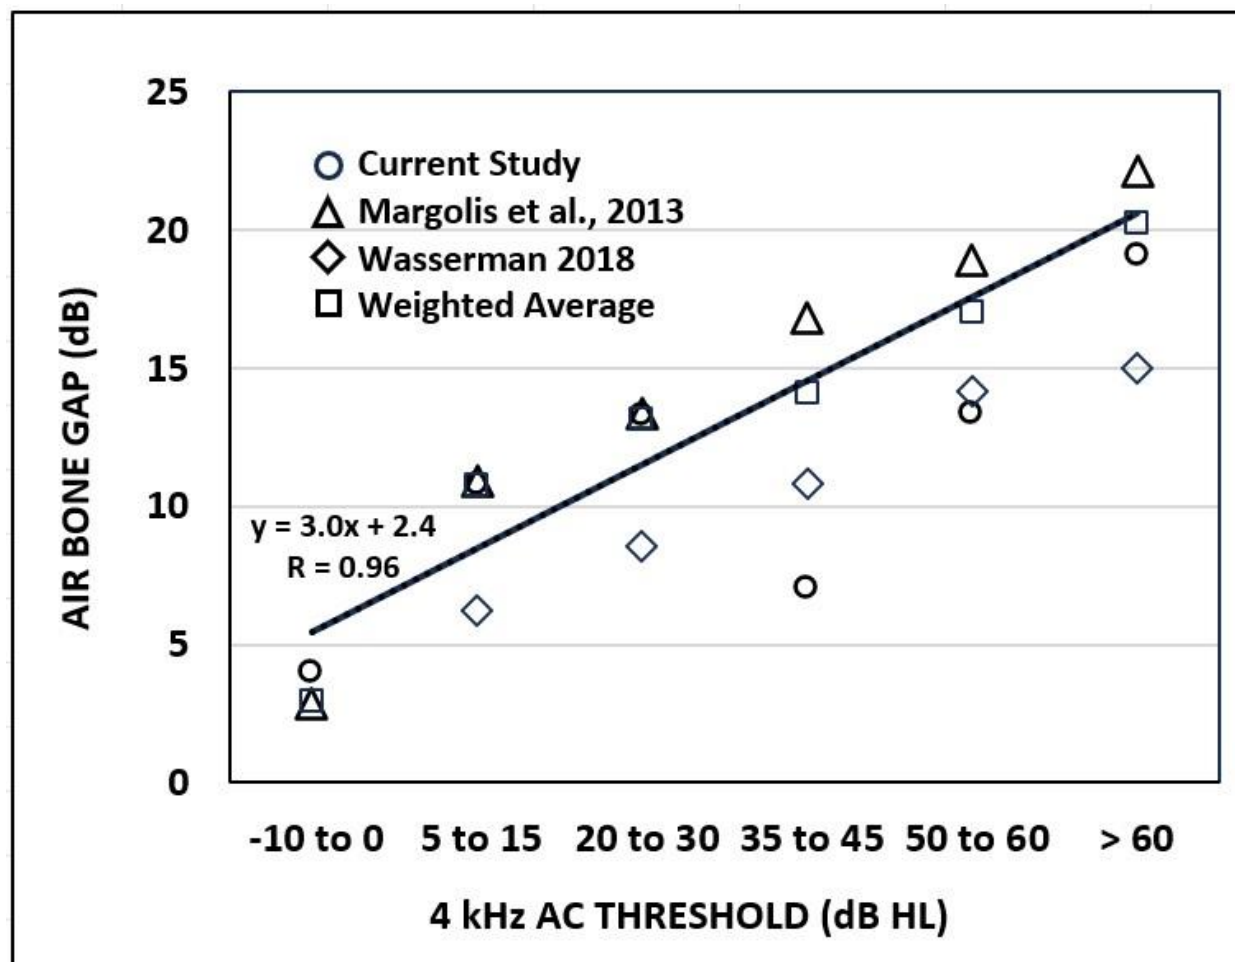

Figure 3. Average Air Bone Gaps plotted against the 4000-Hz AC threshold from three studies. The solid line is the best-fit linear function fit to the weighted average from the three studies.

## DISCUSSION

### Circumaural Earphone RETSPLs

Because the ASU air-conduction thresholds were significantly higher than those from the other sites and from the Smull et al. (2018) data, they were excluded from the data set used to derive RETSPLs.

Weighted average thresholds for the remaining three datasets ( USF, CCHMC, Smull et al. (2018) are shown in Table 3. Weighted average thresholds for normal-hearing listeners obtained with the Radioear DD450 earphone calibrated to Sennheiser HDA 200 RETSPLs ranged from -0.6 dB to 4.0 dB with an

average across frequencies of 1.2 dB. This is consistent with the comparison study of the two earphones reported by Smull et al. (2018). Rounded to the nearest 5 dB, thresholds obtained with the DD450 earphone are on average equivalent to those obtained with the HDA 200 earphone at all test frequencies except 8000 Hz where the average rounded difference is 5 dB (see Table 3, Correction row).

**Table 3. Recommended RETSPLs for the Radioear DD450 earphone. RETSPLs are based on air-conduction thresholds for participants with normal hearing. Corrections are equal to – Weighted Mean Thresholds rounded to the nearest 5 dB.**

| Recommended Reference Equivalent Threshold Sound Pressure Levels For Radioear DD450 Earphones |      |      |     |      |      |      |      |      |      |      |
|-----------------------------------------------------------------------------------------------|------|------|-----|------|------|------|------|------|------|------|
| FREQUENCY (Hz)                                                                                | 250  | 500  | 750 | 1000 | 1500 | 2000 | 3000 | 4000 | 6000 | 8000 |
| n                                                                                             | 43   | 43   | 43  | 43   | 43   | 43   | 43   | 43   | 43   | 43   |
| Weighted Mean Threshold (dB HL)                                                               | 0.2  | -0.6 | 1.4 | 0.0  | 1.3  | 1.4  | 2.6  | 1.0  | 0.9  | 4.0  |
| RETSPL (dB re 20 µPa)                                                                         | 18.2 | 10.4 | 7.4 | 5.5  | 6.8  | 5.9  | 5.1  | 10.5 | 17.9 | 21.5 |
| Correction                                                                                    | 0    | 0    | 0   | 0    | -0   | 0    | 0    | 0    | 0    | -5   |

### Sources of False Air-Bone Gaps

The sources of the false air-bone gaps at 250 Hz and at frequencies above 2000 Hz are probably different. At low frequencies, responses to bone-conduction stimuli can be contaminated by harmonic distortion and vibrotactile sensitivity. There are two reasons that responses to 250-Hz tones are more likely to be contaminated by harmonic distortion than responses at higher frequencies. First, there is greater harmonic distortion, and therefore higher distortion product levels, at 250 Hz than at higher frequencies (Dirks & Kamm, 1975; Ginter & Margolis, 2013; Fréden Jansson et al., 2017; Radioear 2023a, 2023b). Second, because the normal bone-conduction threshold is higher at 250 Hz than at higher frequencies, the 250 Hz tones are presented at higher force levels to achieve thresholds so that the harmonics become audible at lower 250-Hz hearing levels. Eichenauer et al., (2014) reported that harmonics of 250-Hz bone-conduction stimuli may become audible for stimuli as low as 20-dB HL with the B71 vibrator and 30-dB HL with the B81 vibrator. In addition, vibrotactile responses to 250-Hz tones

presented by bone vibrators may contaminate threshold measurements. Vibrotactile thresholds are significantly lower at 250 Hz compared to higher audiometric frequencies (Boothroyd and Cawkwell 1970; Fréden Jansson et al., 2017; Verillo 1963). Boothroyd and Cawkwell (1970) reported an average vibrotactile threshold at 250 Hz of 37-dB HL in listeners with unilateral hearing loss, suggesting that air-bone gaps in listeners with air-conduction thresholds greater than or equal to 40 dB at 250 Hz may produce responses based on vibrotactile sensitivity to inaudible signals.

Taken together, the contaminating influences of harmonic distortion, and vibrotactile responses at 250 Hz suggest that bone-conduction thresholds at that frequency may be contaminated and testing is ill-advised. This runs counter to ANSI S3.21-2004-R2023 American National Standard Methods for Manual Pure-Tone Threshold Audiometry which specifies that bone conduction should be tested at octave frequencies from 250 – 4000 Hz. Survey from Martin et al. (1994) and Finan (2012) reported that 59% and 42% of responding audiologists, respectively, routinely test bone conduction at 250 Hz, suggesting a trend toward decreasing bone-conduction testing at that frequency.

False air-bone gaps at higher frequencies probably have a different source. Early studies of normal bone-conduction sensitivity revealed a simple, elegant relationship between bone-conduction thresholds and frequency. Average thresholds decrease with a slope of -12 dB/octave. (See Corliss et al., 1959 p. 54) shown in Figure 4. The -12 dB/octave slope has a special significance in mechanics. As force decreases at that rate, acceleration remains constant. Corliss et al., (1959) and Whittle (1965) pointed out that the -12 dB/octave slope of the bone-conduction threshold data suggests that bone-conduction sensitivity is determined by the acceleration of structures (like the basilar membrane) responding to sinusoidal displacement. But the frequency dependence of the RETFLs in the standards are not consistent with the Corliss finding or their replications (e.g., Studebaker, 1967; Whittle, 1965; Wilber & Goodhill, 1967) that confirmed the -12 dB/octave relationship. This is illustrated in Figure 4 which shows the Corliss data, a line that decreases at -12 dB/octave, and the RETFLs from ANSI S3.6 and ISO 389.3.

Where the Corliss average thresholds continue to decrease above 2000 Hz, the RETFLs *increase* (dashed line in Figure 4). The result is a difference between the RETFL and the value predicted by the -12 dB/octave relationship of 14.1 dB at 4000 Hz – very close to the false air-bone gaps at that frequency reported in the several studies cited in this article.

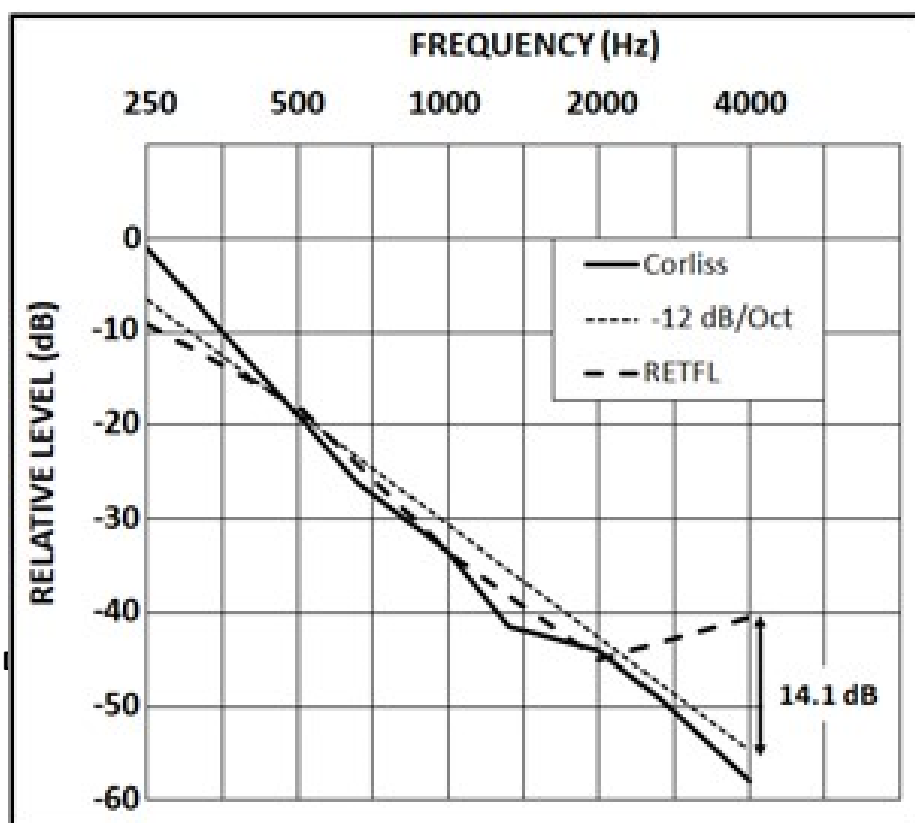

**Figure 4. Normal bone-conduction thresholds from Corliss (1959), a best-fit linear function with a slope of -12 dB/octave, and the bone-conduction RETFLs from ANSI S3.6-2018. The difference between the 4000 Hz RETFL and the best fit function is 14.1 dB, close to the false ABGs measured from listeners with SNHL.**

The foregoing discussion does not explain why the false 4000-Hz air-bone gap increases with the magnitude of the hearing loss in hearing-impaired listeners (Figure 3). We hypothesize that the increase in air-bone gap with increases with hearing loss results from the influence of ambient and physiological noise on bone-conduction thresholds. As the average, normal bone-conduction threshold diminishes at -12 dB/octave with increasing frequency (Figure 4) the stimulus level approaches the noise floor. The



noise floor has contributions from ambient acoustic noise and internal physiological noise. As the signal level approaches the noise floor, the threshold is progressively contaminated, elevating the bone-conduction threshold and decreasing the false air-bone gap. This masking effect can be avoided by selecting participants with SNHL whose thresholds are significantly above, and therefore not masked by, the noise floor as recommended by Carhart (1950) and Roach and Carhart (1956). By basing the RETFLs on results from listeners with SNHL and correcting the high-frequency RETFLs (above 2000 Hz), false air-bone gaps that put these subjects at risk for unnecessary surgery and medical treatment, will be avoided. Although this is a departure from the requirement that participants in studies designed to determine RETFLs be “otologically normal” (ISO 389-9 par. 4.1.3), basing RETFLs on thresholds from participants with sensorineural hearing loss avoids the contamination of thresholds by ambient and physiological noise and results in average air-bone gaps of 0 dB in listeners with normal middle-ear function.

Because normal bone-conduction thresholds decrease with increasing frequency as described above and normal air-conduction thresholds increase with increasing frequency above 3000 Hz (see air-conduction RETSPLs in ISO 389-8:2004, Table 1; ANSI S3.6:2018, Table 8) the noise floor at high frequencies affects air and bone-conduction thresholds differently. With increasing frequency normal bone-conduction thresholds approach the noise floor while normal air-conduction thresholds rise higher than the noise floor. For listeners with SNHL bone-conduction stimulus levels are higher, decreasing the influence of the noise floor. This accounts for the increased in air-bone gaps with increasing hearing loss (Figure 3).

The ISO-389-9 standard that specifies test conditions for studies that are designed to determine RETSPLs and RETFLs requires that the listeners must “otologically normal”. Because hearing loss is a symptom of otologic disease, hearing-impaired listeners are excluded from studies that determine reference threshold levels. Carhart (1950) and Roach and Carhart (1956) warned against deriving RETFLs

from listeners with normal hearing. Carhart (1950) wrote: "False thresholds will also appear in attempts to calibrate the bone unit with normal ears." Roach and Carhart (1956) described a psychophysical method for calibrating bone conduction with threshold data from listeners with SNHL. The rationale was that ambient noise levels, even in sound-treated test rooms may contaminate bone-conduction threshold measurements in normal-hearing listeners, especially when the test ear is uncovered. Internal noise has a similar effect, especially at high frequencies, as discussed above.

RETFLs based only on threshold data from normal-hearing listeners is problematic for the following reasons. First, it is common to omit bone-conduction testing for listeners with normal air-conduction hearing. Thus the bone-conduction calibration standards are based on listeners for whom the test is usually not performed. Second, because normal high-frequency bone-conduction thresholds are elevated by the noise floor, as discussed above, the true relationship between air-conduction and bone-conduction sensitivity is obscured in normal-hearing listeners. Third, basing the high-frequency RETFLs on threshold from normal-hearing listeners will result in false air-bone gaps for listeners with SNHL who are unaffected by the noise floor at high frequencies. For these reasons the recommended RETFLs in this report are based on results from the participants with SNHL.

#### **Recommended Reference Equivalent Threshold Levels.**

Based on these results we recommend the use of the reference equivalent threshold levels presented in Table 3 (RETSPLs) and Table 4 (RETFLs). The following considerations led to these recommendations.

Recommended air-conduction RETSPLs (Table 3) for the Radioear DD450 earphone are based on average air-conduction thresholds for the normal-hearing group. RETSPLs are not affected by the audiometer lower limit of -10 dB because there were only four thresholds at -10 dB at all test

frequencies (less than 1%). This limitation does not result in a measurable bias in average thresholds for the normal-hearing group.

**Table 4. Recommended RETFLs for the Radioear B-81 bone vibrator.**

| Recommended RETFLs (dB re 1 $\mu$ N) |             |      |      |      |      |      |      |      |      |      |
|--------------------------------------|-------------|------|------|------|------|------|------|------|------|------|
| FREQUENCY (Hz)                       | 250         | 500  | 750  | 1000 | 1500 | 2000 | 3000 | 4000 | 6000 | 8000 |
| n                                    | No<br>RETFL | 270  | 45   | 278  | 45   | 266  | 46   | 262  | 45   | 48   |
| Weighted Mean ABG (dB)               |             | 0.6  | 0.5  | 1.4  | -0.8 | 0.9  | 6.8  | 15.0 | 15.6 | 31.0 |
| Mastoid RETFL                        |             | 57.4 | 48.0 | 41.1 | 37.3 | 30.1 | 23.2 | 20.5 | 24.4 | 11.5 |
| Forehead RETFL                       |             | 71.4 | 61.0 | 49.6 | 48.3 | 41.6 | 35.2 | 28.5 | 35.4 | 21.5 |
| Correction                           |             | 0    | 0    | 0    | 0    | 0    | 5    | 15   | 15   | 30   |

Table 4 shows the recommended RETFLs, adjusted mastoid RETFLs (Mastoid row), and adjusted forehead RETFLs (Forehead row). The values in the correction row are post-hoc corrections that clinicians can employ if their audiometers are calibrated to the current RETFLs. These are the average air-bone gaps for the SNHL group rounded to the nearest 5 dB. These corrections will eliminate false air-bone gaps in most listeners with SNHL.

As discussed above, bone-conduction thresholds at 250 Hz are contaminated by two sources: harmonic distortion, and vibrotactile sensitivity. These considerations have led many audiologists to forgo bone-conduction testing at that frequency (Martin et al., 1994; Finan, 2012). While the survey data should not be taken as proof that 250-Hz bone-conduction thresholds do not contribute to the clinical evaluation of patients, they are an indication that audiologists forgo testing at that frequency without adverse consequences. Because bone-conduction thresholds at 250 Hz are contaminated by harmonic distortion and vibrotactile sensitivity, we recommend that bone-conduction testing at 250 Hz be omitted from the routine audiometric evaluation. Although the newer B-81 bone vibrator has lower harmonic distortion than the B-71, the distortion at 250 Hz (4%, Radioear B-81 Datasheet) is higher than at other audiometric frequencies and still potentially problematic.

Air-bone gaps at frequencies 500 – 1500 Hz are close to zero for both the normal-hearing group and the SNHL group. No changes in the RETFLs are recommended at those frequencies.

At 2000 Hz small, statistically-significant, negative air-bone gaps were observed for both subject groups (see Table 2). The 90% confidence interval for both groups combined was -1.8 to -5.8 dB. Because the confidence interval did not encompass 0 dB, a small correction is recommended.

At frequencies above 2000 Hz air-bone gaps were observed that increased with frequency and are larger for the SNHL group than for the normal group, probably due to the contaminating influence of internal and ambient noise which affects normal-hearing listeners more than listeners with hearing loss. Adjustments to the RETFLs are recommended at those frequencies based on the air-bone gaps observed for the SNHL group.

## **CONCLUSION**

Small differences in air-conduction thresholds obtained with Radioear DD450 earphones and standard RETSPLs for circumaural earphones were observed, mostly within 2 dB. A revised RETSPL is recommended at 8000 Hz only.

Air and bone-conduction thresholds from listeners with normal hearing and SNHL are characterized by false air-bone gaps at 250 Hz and frequencies above 2000 Hz. Contamination of 250-Hz bone-conduction threshold measurements by harmonic distortion and vibrotactile sensitivity result in unreliable threshold measurements. Routine testing of bone conduction at that frequency is not recommended. High-frequency air-bone gaps result from erroneous RETFLs in the standards. Bone-conduction RETFLs for frequencies above 2000 Hz should be based on test results from listeners with SNHL because high-frequency bone-conduction thresholds from normal-hearing listeners are contaminated by effects of ambient and internal noise. Many clinics have adopted bone conduction correction factors for patients with hearing loss due to the known error in high-frequency RETFLs

because the occurrence of false air-bone gaps can result in unnecessary medical and surgical treatment.

To avoid these false air-bone gaps revised RETFLs are recommended. The international and American standards should be modified to eliminate false indications of middle-ear disease which put patients at risk.

## ACKNOWLEDGEMENTS

We are grateful to Travis McColley and Steve Wood for their assistance with calibration of the audiometers used in this study. Richard Wilson provided a very helpful review of the manuscript.

## DISCLOSURES

Portions of this work were presented at the annual conference of the American Auditory Society (AAS) in Scottsdale, AZ, March 3, 2023, The American Academy of Audiology (AAA) in Seattle, WA, April 21, 2023, and the 8th International Congress on Bone Conduction Hearing and Related Technologies (OSSEO) in Denver, CO, September 7, 2023.

## REFERENCES

American National Standards Institute. 2004. *Methods for Manual Pure-Tone Threshold Audiometry (ANSI/ASA S3.21-2004) (R2019)*. New York: Acoustical Society of America.

American National Standards Institute 2018. *Specification for audiometers. ANSI/ASA S3.6-2018*. New York: Acoustical Society of America.

Boothroyd, A., Cawkwell, S. 1970. Vibrotactile thresholds in pure tone audiometry. *Acta Otolaryngologica* 69, 381-387.

Carhart, R. 1950. "Clinical application of bone conduction audiometry. *Archives of Otolaryngology* 51, 798-807.

Corliss E.L.R., Smith E.L., Magruder J.O. 1959. "Hearing by bone conduction." *Proceedings of the Third International Congress on Acoustics*. Elsevier Publishing Company, Amsterdam, 53-55.

Dirks, D.D., Kamm, C. 1975. "Bone-vibrator measurements: physical characteristics and behavioral thresholds." *Journal of Speech and Hearing Research* 18, 242-260.

Eichenauer, A., Dillon, H., Clinch, B., Loi, T. 2014. "Effect of bone-conduction harmonic distortions on hearing thresholds." *JASA Express Letters* 136, EL96-EL102.

Eikelboom, R.H., Swanepoel, D.W., Motakef, S., Upson, G.S. 2013. "Clinical validation of the AMTAS automated audiometer." *International Journal of Audiology* 52, 342-549.

Finan, R.M. 2012. "Survey of the current status of audiometric practices in the United States." University of Northern Colorado unpublished report, 1-132.

Fréden Jansson, K.J., Håkansson, B., Reinfeldt, S., Fröhlich, L., Rahne, T. 2017. "Vibrotactile thresholds on the mastoid and forehead position of deaf patients using Radioear B71 and B81." *Ear and Hearing* 38, 714-723.

Fröhlich, L., Plontke, S.K., Rahne, T. 2018. "Influence of transducer types on bone conduction hearing thresholds." *PLOS ONE*, April 11, 2018, 1-11.

International Standards Organization (2016). *ISO 389-3 Acoustics – Reference zero for the calibration of audiometry equipment – Part 3: Reference equivalent threshold force levels for pure tones and bone vibrators*. Geneva: International Standards Association.

International Standards Organization 2004. *ISO 389-8 Acoustics – Reference zero for the calibration of audiometry equipment – Part 8: Reference equivalent threshold force levels for pure tones and circumaural earphones*. Geneva: International Standards Association.

International Standards Organization 2009. ISO 389-9:2009. *Reference zero for the calibration of audiometric equipment- Part 9: Preferred test conditions/or the determination of reference hearing threshold levels*. Geneva: International Standards Association.

Mahomed, F., Swanepoel, D.W., Eikelboom, R.H., Soer, M. 2013. "Validity of automated threshold audiometry: a systematic review and meta-analysis." *Ear and Hearing* 34, 745-752.

Margolis, R.H., Eikelboom, R.H., Johnson, C., Ginter, S.M., Swanepoel, D.W., Moore, B.C.J. 2013. "False Air-Bone Gaps at 4 kHz in Listeners with Normal Hearing and Sensorineural Hearing Loss." *International Journal of Audiology* 52, 526-532.

Margolis, R.H., Eikelboom, R.H., Moore, B.C.J., Swanepoel, D.W. 2019. "False 4-kHz Air-Bone Gaps – A Failure of Standards" *Audiology Today*, 31, 14-21.

Margolis, R.H., Glasberg, B.R., Creeke, S., Moore, B.C.J. 2010. "AMTAS® - Automated Method for Testing Auditory Sensitivity: Validation Studies." *International Journal of Audiology*, 49, 185-194.

Margolis, R.H., Killion, M.C., Bratt, G.W., Saly, G.L. 2016. "Validation of the Home Hearing Test. *Journal of the American Academy of Audiology*, 27, 416-420.

Margolis, R.H., Margolis, J.C. 2022. "AMBAND Bone Conduction Headband." *Journal of the American Academy of Audiology*, 33, 214-219.

Margolis, R.H., Moore, B.C.J. 2011. "Automated method for testing auditory sensitivity: III. Sensorineural hearing loss and air-bone gaps." *International Journal of Audiology*, 50, 440-447.

Margolis, R.H., Wilson, R.H., Popelka, G.R., Eikelboom, R.H., Swanepoel, D.W. 2016. "Distribution characteristics of air-bone gaps: evidence of bias in pure-tone audiometry," *Ear & Hearing*, 37, 177-188.

Margolis, R.H., Saly, G.L., Wilson, R.H. 2022. "Ambient noise monitoring during pure-tone audiometry." *Journal of the American Academy of Audiology*, 33, 45-56.

Martin, F.N., Armstrong, T.W., Champlin, C.A. 1994. "A survey of audiological practices in the United States." *American Journal of Audiology*, 3, 20-26.

Møller, H. 1996. "Preferred test conditions for determining hearing thresholds for standardization." *Scandinavian Audiology*, 25, 45-52.

Radioear 2023a. B71 Technical Specifications. <http://www.radioear.us/products/bone-transducers>.

Radioear 2023b. B81 Technical Specifications. <http://www.radioear.us/products/bone-transducers>.

Rao, A., Altus, B., Schroeder, R., Margolis, R.H. 2020. "Comparison of thresholds obtained with the Radioear B-71 and B-81 Bone-Conduction Transducers." *Ear and Hearing*, 41, 1775-1778.

Roach, R.E., Carhart, R. 1956. A clinical method for calibrating the bone conduction audiometer. *Archives of Otolaryngology*, 63, 270-279.

Smull, C.C., Madsen, B., Margolis, R.H. 2018. "Evaluation of two circumaural earphones for audiometry." *Ear and Hearing*, 40, 177-183.

Studebaker, G.A. 1967. "The standardization of bone-conduction thresholds." *Laryngoscope*, 77, 823-835.

Verillo, R.T. 1963. "Effect of contact area on the vibrotactile threshold." *Journal of the Acoustical Society of America*, 35, 1962-1966.

Vijayasarathy, S., Shetty, H.N. 2023. "Pseudo air-bone gap in sensorineural hearing loss: effect of signal frequency and degree of hearing loss – implications for clinical diagnosis." *Indian Journal of Otology*, 29, 57-90.



Whittle, J.S. 1965. "A determination of the normal threshold of hearing by bone conduction." *Journal of Sound and Vibration* 2, 227-248.

Wilber, L.A., Goodhill, V. 1967. "Real ear versus artificial mastoid methods of calibration of bone-conduction vibrators." *Journal of Speech and Hearing Research*, 10, 405-416.

### SUPPLEMENTAL DIGITAL CONTENT

#### 1. Test Sites, Equipment, Bone Conduction Threshold Corrections

Arizona State University  
Project Coordinator – Aparna Rao, Ph.D.  
Audiometer – GSI Audiostar Pro  
Earphones – Radioear DD450  
Bone Vibrator – Radioear B81  
Bone Conduction Corrections: None

Cincinnati Childrens Hospital Medical Center  
Project Coordinator – Lisa L. Hunter, Ph.D.  
Audiometer – Interacoustics Equinox  
Earphones – Radioear DD450  
Bone Vibrator – Radioear B81  
Bone Conduction Corrections: Forehead thresholds converted to mastoid (see corrections below)

University of South Florida Morsani College of Medicine  
Project Coordinator – Victoria Sanchez, Ph.D.  
Audiometer – GSI Audiostar Pro  
Earphones – Radioear DD450  
Bone Vibrator – Radioear B81  
Bone Conduction Corrections: Forehead thresholds converted to mastoid (see corrections below)

#### 2. Forehead – Mastoid Bone Conduction Corrections

From ANSI S3.6 – 2018 Table 8 p. 33 and ISO 389-3-2016, Table C.1, p. 10

| Frequency (Hz)        | 250  | 500  | 750  | 1000 | 1500 | 2000 | 3000 | 4000 | 6000 | 8000 |
|-----------------------|------|------|------|------|------|------|------|------|------|------|
| Forehead-Mastoid (dB) | 12.0 | 14.0 | 13.0 | 8.5  | 11.0 | 11.5 | 12.0 | 8.0  | 11.0 | 10.5 |

#### 3. Individual Threshold Data

See Tables S1 and S2
